# Supplementary material for: Tn6188 - A Novel Transposon in Listeria monocytogenes Responsible for Tolerance to Benzalkonium Chloride
Source: PLOS journal article supplement (doi:10.1371/journal.pone.0076835), 2013-10-02
Supplement: S3 (10.1371/journal.pone.0076835.s003) [file journal.pone.0076835.s003.PDF]

**UCC Library and UCC researchers have made this item openly available.  
Please [let us know](#) how this has helped you. Thanks!**

|                                    |                                                                                                                                                                                                                                                                                                                                                                          |
|------------------------------------|--------------------------------------------------------------------------------------------------------------------------------------------------------------------------------------------------------------------------------------------------------------------------------------------------------------------------------------------------------------------------|
| <b>Title</b>                       | Tn6188 - a novel transposon in <i>Listeria monocytogenes</i> responsible for tolerance to benzalkonium chloride                                                                                                                                                                                                                                                          |
| <b>Author(s)</b>                   | Mueller, Anneliese; Rychli, Kathrin; Muhterem-Uyar, Meryem; Zaiser, Andreas; Stessl, Beatrix; Guinane, Caitriona M.; Cotter, Paul D.; Wagner, Martin; Schmitz-Esser, Stephan                                                                                                                                                                                             |
| <b>Publication date</b>            | 2013                                                                                                                                                                                                                                                                                                                                                                     |
| <b>Original citation</b>           | Müller A, Rychli K, Muhterem-Uyar M, Zaiser A, Stessl B, Guinane CM, et al. (2013) Tn6188 - A Novel Transposon in <i>Listeria monocytogenes</i> Responsible for Tolerance to Benzalkonium Chloride. PLoS ONE 8(10): e76835. doi:10.1371/journal.pone.0076835                                                                                                             |
| <b>Type of publication</b>         | Article (peer-reviewed)                                                                                                                                                                                                                                                                                                                                                  |
| <b>Link to publisher's version</b> | <a href="http://dx.doi.org/10.1371/journal.pone.0076835">http://dx.doi.org/10.1371/journal.pone.0076835</a><br>Access to the full text of the published version may require a subscription.                                                                                                                                                                              |
| <b>Rights</b>                      | © 2013 Müller et al. This is an open access article distributed under the terms of the Creative Commons Attribution License, which permits unrestricted use, distribution, and reproduction in any medium, provided the original author and source are credited<br><a href="http://creativecommons.org/licenses/by/4.0/">http://creativecommons.org/licenses/by/4.0/</a> |
| <b>Item downloaded from</b>        | <a href="http://hdl.handle.net/10468/2364">http://hdl.handle.net/10468/2364</a>                                                                                                                                                                                                                                                                                          |

Downloaded on 2023-03-26T16:21:55Z

Figure S2

```

L. mono. EGD-e           1  -----ATGTTGACACATGAAATATCAGAGAATGAAAAACCACGC
L. mono. F2365          1  -----ATGTTGATACATGAAATATCAGAGAATGAAAAACCACGC
L. mar. FSL S4-120     1  -----ATGTTAATTAATGAAGTTCTGGAAAATGAAAAACCGCCT
L. inn. Clip11262     1  -----ATGCTAGTAAATGAAATCTCGGAAAATGAGAAGCCACGA
L. wel. SLCC5334       1  -----ATGCTTACAAGTGAGATTTTCAGAAAAGCGAAAAACCACGT
L. iv. FSL F6-596     1  -----ATGTTATCAAACGAAATTTTCAGGAAATGAGAAGCCTCGC
L. seel. SLCC3954     1  -----ATGCTAGCAAACGAAATTTTCAGGGAGCGAAAAGCCCCGT
L. gr. DSM20601       1  -----ATGCAAATGAAAGAAATGCAGATTTTTTGATAAACCTCGA
B. smi. 7_3_47FAA     1  -----TTGTCAAAGAATCGCTTAGGATCCATAACCTTCACGTGAAGATCGGCCGCGG
B. coag. 36D1         1  -----TTGGAAAAATGCTGATCAAAGATTTTCTGCAGAAAGACCGCCCGCT
B. subt. 168          1  TTGGTCATACACGATCTGCCATTAATACTCAAAGATTTCCCAATGAAAGAAAAGCCAAAG
B. weih. KBAB4        1  -----ATGAACGGTATTCGTGATGTTGTGAGAGAAGAACGCCACGG
S. aur. COL           1  -----TTGAAAATTAAGAAATGGTAACTTCAGAAATGCCAAGA
S. aur. 71193         1  -----TTGAAAATTAAGAAATGGTAACTTCAGAAATGCCAAGA
E. faec. DO           1  -----TTGGAAAACGATTGATCAAAGAAGTACCTACTAGCTCTTTACCAAG
consensus              1  . . . . . * . . . * . . . . . * . . . . . * . . . . .

```

```

L. mono. EGD-e           40  GAAAAACTTCAGAATTATGGGTATAGAAGCACTTTCATCTTCGGAACCTGGTTGCTTTAATT
L. mono. F2365          40  GAAAAGCTACAGAATTATGGGATAGAAGCACTTTCATCTTCGGAATTGGTTGCTTTAATT
L. mar. FSL S4-120     40  GAAAAGTTACAGAATTATGGGATAGAGGCTCTTTCCTTCTTCGGAGTTAGTTGCTTTAATT
L. inn. Clip11262     40  GAAAAATTACAAAATTATGGGATAGAGGCGCTTTCGACTTCGGAGTTAGTTGGCATTAAATT
L. wel. SLCC5334       40  GAAAAACTTCAAAATTATGGGATAGAGGCTCTTTCGTCATCGGAATTAGTCGCGTTAATA
L. iv. FSL F6-596     40  GAGAAATTACAAAATATGGTATAGAGGCACTTTCATCTTCAGAATTAGTCGCAATTATC
L. seel. SLCC3954     40  GAAAAGCTACAAAATTATGGCATTGAAGCACTTTCACGTCAGAGCTTGTTCGATAATA
L. gr. DSM20601       40  GAAAAATGCAGACAAGAGGGCAAGCCCAACTTACCATAACGGAACTTCTTGCATATTA
B. smi. 7_3_47FAA     55  GAACGACTGATATTAAGAGGAGCGCACAGCTTGTCCAACCATGAATTGATCGCCATTCTT
B. coag. 36D1         49  GAACGGTTGATCCGCACAGGAGCGGAGAGCTCTCCAATCAGGAATTTGCTGCCATTTTA
B. subt. 168          61  GAACGGCTCCTGAAGTCGGAGCCGAGAACTTAGCGAATCATGACTTTTGGCTATATTA
B. weih. KBAB4        43  GAGCGTTTATTGTTAGAAAGGAGCAGGAAGTTTATCGAATCGAGAACTTCTTGCAGTTTTA
S. aur. COL           40  GAACGTTTGTAAAGCCATGGTGCAAAAGTCTTTCGAATACAGAATTATTAGCTATATTA
S. aur. 71193         40  GAACGTTTGTAAAGCCATGGTGCAAAAGTCTTTCGAATACAGAATTATTAGCTATATTA
E. faec. DO           49  GAACGTATGAAAATTTATGGCGCGGAAGCTTTTATCGGATCAGGAGCTTTTGGCAATCTTA
consensus              61  ** . . . . * . . . . . ** . . . . . * . . . * . . . . . * . . . . . ** * . . *

```

```

L. mono. EGD-e           100  ATTGAAACAGGAACATAAAAATGAGTCAGTTTTGACGATAGCTAATCGAATCATCATGAAG
L. mono. F2365          100  ATTGAAACAGGGACTATAAAAATGAGTCAGTTTTGACGATAGCTAATCGAATCATCATGAAA
L. mar. FSL S4-120     100  ATTGAAACTGGAACGAAAAATGAGTCTGTTTTAACAATAGCAAATCGAATTATTATGAAA
L. inn. Clip11262     100  ATTGAAACTGGAACGAAAAATGAGTCTGTTTTAACAATAGCAAATCGAATTATTATGAAA
L. wel. SLCC5334       100  ATTGAAACAGGCACAAAAAATGAATCGGTTTTAACAATAGCAAATAGAATTATCATGAAA
L. iv. FSL F6-596     100  ATTGAAACAGGCACGAAAAGTGAATCGGTTTTAACAATAGCAAATCGAATTATTATGAAA
L. seel. SLCC3954     100  ATTGAAACAGGAACGAAAAATGAGTCTGTTTTGACAATAGCAAATCGAATTATTATGAAG
L. gr. DSM20601       100  TTGGAAACGGGAACGAAAGAAGATTCGGTTTTATCATTAGCCAATAAAAATCATTCTTAAA
B. smi. 7_3_47FAA     115  CTCAGTTCGGGACAAAAGAAGAGTCCGTCTGCAGCTGGCAAATCGGCTATTAATCAG
B. coag. 36D1         109  CTCCTTACCCTGACGAAAGAAGAAATCGTGTGCTCGAGCTTGCCAACAGACTGATCCGCCAT
B. subt. 168          121  TTGCGGACAGGGACTAAACACGAATCTGTTTTGGACCTGTCAAACCGGCTGCTGCGCTCA
B. weih. KBAB4        103  CTCAGAACGGGTTCTAAAGAAGAAACGGTGTAAACGTTATCAGATAAATTCTCCATCAT
S. aur. COL           100  ATTAACACCGGAAGAAAAGGATTCTCGAGCATAGACATTAGTAATGAACTGCTTAAATCT
S. aur. 71193         100  ATTAACACCGGAAGAAAAGGATTCTCGAGTATTACATTAGTAATGAACTGCTTAAATCT
E. faec. DO           109  CTGCGTACCCTGCAACACCCTTATAGTGTGATGTGATGCTGGAAATCTGTTAAAAACG
consensus              121  . * . . . . * . . . . . * . . . . . * . . . . . * . . . . . * . . . . .

```

|                 |            |     |                                                                          |
|-----------------|------------|-----|--------------------------------------------------------------------------|
| <i>L. mono.</i> | EGD-e      | 160 | TTC AAAAATGTGGGTGAAATGCAATATGCTTCTATAGAAGAATTCAATTAGTTAATGGT             |
| <i>L. mono.</i> | F2365      | 160 | TTC AAAAACGTGGCCGAAATGCAATATGCTTCTATAGAAGAATTCAAGTTAGTTAATGGT            |
| <i>L. mar.</i>  | FSL S4-120 | 160 | TTC AAAAATGTGGCAGAAATGCAGTATGCTTCTATTGAAGAATTCAATTAGTTAATGGT             |
| <i>L. inn.</i>  | Clip11262  | 160 | TTTAAACATATAGCTGAAATGCAGTACGGCTCTATTGAAGAATTCAATTAGTTAATGGT              |
| <i>L. wel.</i>  | SLCC5334   | 160 | TTTAAACATGTAGCAGAAATGCAATATGCTTCAATCGAAGAAATCCAACCTTGTGAATGGA            |
| <i>L. iv.</i>   | FSL F6-596 | 160 | TTCAAACATGTAGCTGAAATGCAATATGCTTCTTTTGAAGAGTTCAATTAAATTAATGGC             |
| <i>L. seel.</i> | SLCC3954   | 160 | TTTAAACATGTAGCAGAAATGCAATATGCTTCTTTAGAAGAACTTCAATTAATTAACGGA             |
| <i>L. gr.</i>   | DSM20601   | 160 | TATAAATCGCTAGGAGATATCAAAGATCTGACTATCGAAGAATTGCGATCTATCAATGGT             |
| <i>B. smi.</i>  | 7_3_47FAA  | 175 | TTTGAAGGATTACGAATGTTAAAAGATGCTACTTTAGAAGAAATTACCTCTATTAAAGGA             |
| <i>B. coag.</i> | 36D1       | 169 | TTTGAAGGCTTGGCGTTTTTAAAAGATGCTTCCCTTGAGGAAATGACGTCATCAAAGGC              |
| <i>B. subt.</i> | 168        | 181 | TTTGACGGGCTGCGCCTGCTCAAGGAAGCATCGGTTGAAGAGCTGTCAAGCATCCCGGGA             |
| <i>B. weih.</i> | KBAB4      | 163 | TTTGACGGCTTACGAATGTTAAAGGATGCAACGTTAGAAGAGATGATGAGCATTTCATGGT            |
| <i>S. aur.</i>  | COL        | 160 | GCTTCGAATCTGAATGAATTGAAAAAATCTTCAATTAACGATTTGATAAAAAGTTAAAGGG            |
| <i>S. aur.</i>  | 71193      | 160 | GCATCGAATCTGAATGAATTGAAAAAATCTTCAATTAACGATTTGATACAGTTAAAGGG              |
| <i>E. faec.</i> | DO         | 169 | TTTGGAGGACTGGCCTCTTTACGACAGGCTACTTTGCATGAGTTAGAAGAGATTTCGAGG             |
| consensus       |            | 181 | .....*.....*.....*.....*.....*.....*.....*.....*.....*.....*.....*.....* |

|                 |            |     |                                                                      |
|-----------------|------------|-----|----------------------------------------------------------------------|
| <i>L. mono.</i> | EGD-e      | 220 | ATTGGAATAGCAAAAGCTTCTAAAATCATGGCTGCGATTGAACTAGGAAGGCGTATCAGC         |
| <i>L. mono.</i> | F2365      | 220 | ATCGGAATAGCAAAAGCTTCTAAAATCATGGCTGCGATTGAACTTGGAAAGACGTATCGGC        |
| <i>L. mar.</i>  | FSL S4-120 | 220 | ATCGGAATAGCTAAAGCATCTAAAATATGGCTGCAGTTGAACTTGGTAGGCGTATAAGT          |
| <i>L. inn.</i>  | Clip11262  | 220 | ATTGGAATTGCTAAAGCCTCAAAAATATGGCAGCAGTCAACTTGGAAAACGCATCAGT           |
| <i>L. wel.</i>  | SLCC5334   | 220 | ATTGGACTAGCAAAGCCTCAAAAATAATGGCAGCAATTGAGCTGGGTAGGCGTATTAGT          |
| <i>L. iv.</i>   | FSL F6-596 | 220 | ATTGGTATTGCTAAAGCTTCTAAAATAATGGCCGCTATTGAATTAGGAAAGAGAATTAGT         |
| <i>L. seel.</i> | SLCC3954   | 220 | ATAGGCTTGGCAAAGCCTTCAAAAATAATGGCAGCAGTAGAATTAGGAAACGAATTAGC          |
| <i>L. gr.</i>   | DSM20601   | 220 | ATTGGACTTGGCAAAGCTACTAAAATCATGGCTGCGATCGAGATTGGGAAACGGATCTGT         |
| <i>B. smi.</i>  | 7_3_47FAA  | 235 | ATTGGTTCGGGCGAAAGCTGTTCAAAATCATGGCGGCGCTGGAACTGGGCAGACGTATCCAC       |
| <i>B. coag.</i> | 36D1       | 229 | ATCGGCACAGCAAAAGCGGTCCAGATTCTGGCCGCGATTGAACTCGGCAGAAGGATTGCC         |
| <i>B. subt.</i> | 168        | 241 | ATCGGTATGGTAAAAGCGATTCAAATACTGGCAGCAGTTGAGCTTGGAAAGCCGGATTTCAT       |
| <i>B. weih.</i> | KBAB4      | 223 | GTGGGATTGCAAAGCGCTCGCAGCTTATGGCTGCTTTTGAATTAGGTAGAAGAATGGTA          |
| <i>S. aur.</i>  | COL        | 220 | ATTGGATTACAAAAGCAATTAATTTAAAAGCAGCATTGAGTTAGGGGAAAGGATGGGG           |
| <i>S. aur.</i>  | 71193      | 220 | ATTGGATTACAAAAGCAATTAATTTAAAAGCGGCATTGAGTTAGGGGAAAGGATGGGG           |
| <i>E. faec.</i> | DO         | 229 | ATAGGACGCGTGAAGCAATCGAAATCAAAGCCTTGATCGAATTAGGTGACGAATTCA-           |
| consensus       |            | 241 | .*.**.....**.*.....*.....*.....*.....*.....*.....*.....*.....*.....* |

|                 |            |     |                                                              |
|-----------------|------------|-----|--------------------------------------------------------------|
| <i>L. mono.</i> | EGD-e      | 280 | ATCGTAACGGAGCAGGAAGAA-----GTGGTTGTTAGGTGTCCCGAAGATGCAGTAAAA  |
| <i>L. mono.</i> | F2365      | 280 | ATCGTAACGGAGCAGGAAGAA-----GTGGTAGTTAGGTGTCCCGAAGATGCGGTAAAA  |
| <i>L. mar.</i>  | FSL S4-120 | 280 | TTAGTAACAGAACAAAGAGGAG-----GTTGTTGTTAGGTGCCCTGAAGATGCCGTTAAA |
| <i>L. inn.</i>  | Clip11262  | 280 | TTAGTTACGGAACAAAAGAA-----ATTGTCATTAGATGTCCGGAAGATGCCCGTGAAA  |
| <i>L. wel.</i>  | SLCC5334   | 280 | ATTGTAACATAACAAGAA-----ATTGTTATTAGATGCCCTGATGACGCGGTGAAA     |
| <i>L. iv.</i>   | FSL F6-596 | 280 | TTAGTAACGGAGCGTGAAGAA-----ATTGTCATTAGATGTCCAGGGGATGCAGCGAAA  |
| <i>L. seel.</i> | SLCC3954   | 280 | TTAGTGACAGAGCGCGAAGAA-----ATTGTAATAAGATGCCCTGACGATGCAGTAAAA  |
| <i>L. gr.</i>   | DSM20601   | 280 | CTGCAAAGTGAATCGAAAAAATAATATAGCGATCGAAGTCCACAAGATGCAGTGTCC    |
| <i>B. smi.</i>  | 7_3_47FAA  | 295 | AGTCTTTCATTAGACGAACGG-----TATGTTATCCGCTCTCCCGAAGACGGTGCAAAAT |
| <i>B. coag.</i> | 36D1       | 289 | AATTTGCAGCACGATACACGT-----TATGTAATCCGCACGCCGCAAGACGGGGCCAAT  |
| <i>B. subt.</i> | 168        | 301 | AAATTAGCCACGAAGAACAT-----TTCGTTATTTCGCTCCCGGAAGACGGCGCTAAT   |
| <i>B. weih.</i> | KBAB4      | 283 | CGTTTAGAATATCAAATAGA-----TATAGTATTTCGAAGTCCAGAAGATTGTGCGAGT  |
| <i>S. aur.</i>  | COL        | 280 | AGAAGAGCTGAAAATAATCGT-----ATAAAAATAACGCAACCAAGTGATGTTGCTGAT  |
| <i>S. aur.</i>  | 71193      | 280 | AGAAGAGCTGAAAATAATCGT-----ATAAAAATAACGCAACCAAGTGATGTTGCTGAT  |
| <i>E. faec.</i> | DO         | 288 | -----GACGGATCATGAAAGAGCGGCTCCACCGTTTCGTACCAGCTACGAATTGGCCAG  |
| consensus       |            | 301 | .....*.....*.....*.....*.....*.....*.....*.....*.....*.....* |

*L. mono.* EGD-e 334 CTTGTAATGCCAGAGCTTGCTTTTCTGTTTCAAGAACATTTCCATTGCGCTATTTTTTAAAT  
*L. mono.* F2365 334 CTTGTAATGCCAGAGCTTGCTTTTCTTTTCAAGAACATTTCCATTGCTATTTTTTAAAT  
*L. mar.* FSL S4-120 334 TTGGTAATGCCTGAGTTAGCGTTTCTTTTCAAGAACATTTCCACTGCCTCTTTTTTAAAC  
*L. inn.* Clip11262 334 CTAGTAATGCCTGAGTTAGCTTTCTTTTCAAGAACATTTCCACTGTATTTTTTAAAC  
*L. wel.* SLCC5334 334 TTAGTAATGCCTGAATAGCTTTTTTTGTTTCAAGAACATTTTCACTGTATTTTTCTAAAT  
*L. iv.* FSL F6-596 334 TTAGTTATGCCGGAATAGCTTTTCTTTTCAAGAACATTTTCACTGCATTTTTTAAAT  
*L. seel.* SLCC3954 334 TTAGTTATGCCAGAAATAGCAATTTCTATTTCAAGAACATTTTCACTGCATTTTTCTAAAT  
*L. gr.* DSM20601 340 ATTGTTTGGCCAGAGCTTGCTTTTCTTTTCAAGAACATTTTCCATTGCGTGCCTTTTGAAT  
*B. smi.* 7\_3\_47FAA 349 TATGTCATGCAAGAAATGCGGTTTTTTAACACAAGAACATTTTCGTGTGCCTCTTCCCTAAC  
*B. coag.* 36D1 343 TATGTCATGAATGATATGCGCTTTTTTATCCCAAGGAGCATTTTTGTCTGCCTGTATTTAAAT  
*B. subt.* 168 355 CTTGTCATGGAGGATATGCGCTTTTTTAAACCAGGAGCATTTTTGTCTGTTTATACTTAAAT  
*B. weih.* KBAB4 337 TATATGATGGAAGAGATGCGTTTTTTGCAACAGGAGCATTTTTGTGTTTATATTTGAAT  
*S. aur.* COL 334 TATATGATTTCCAACAATGAAAGATTTAACAACAAGAACATTTTGTGATTTTATTGTTAAAT  
*S. aur.* 71193 334 TATATGATTTCCAACAATGAAAGATTTAACAACAAGAACATTTTGTGATTTTATTGTTAAAT  
*E. faec.* DO 343 CAATGATTTCTGGAATGAAAGATCACAACAAGAACATTTGGTTGTATTTATTGGGAC  
consensus 361 .....\*.....\*.....\*\*..\*\*..\*\*\*\*\*.....\*.....\*..\*..

*L. mono.* EGD-e 394 ACCAAAAATCAAGTAATATATCGGCAAACGATTTTTGTTGGTGGTCTGAATGCTTCCATC  
*L. mono.* F2365 394 ACCAAAAATCAAGTAATATATCGGCAAACGATTTTTGTTGGTGGTCTGAATGCTTCCATC  
*L. mar.* FSL S4-120 394 ACAAGAATCAAGTGATTTATCGACAACAATCTTTGTTGGTGGACTGAATGCGTCAATC  
*L. inn.* Clip11262 394 ACCAAGAATCAAGTGATTTATAGGCAAACAATCTTTGTCGGTGGTTGAATGCTTCCATT  
*L. wel.* SLCC5334 394 ACTAAGAATCAAGTCATTTATAGCAAAACTATTTTTGTTGGAGGATTAATGCATCGATT  
*L. iv.* FSL F6-596 394 ACTAAAAATCAAGTCATTTACAGACAACGATTTTTGTTGGGGACTAAATGCATCTATT  
*L. seel.* SLCC3954 394 ACAAAAAATCAAGTAATCTATAGACAACAATTTTTCGTTGGTGGATTAATGCATCCATC  
*L. gr.* DSM20601 400 ACACGAAATCAGATTGTTTCATCGTCAGACTATCTTTATCGGCAGTTTGAATGCTTCTATT  
*B. smi.* 7\_3\_47FAA 409 ACCAAAAATCAAGTTCTCCACAACAACCATTTTTTATCGGTAGTTTGAATGCTTCGATT  
*B. coag.* 36D1 403 ATTAAAAATCAAGTGATCCACCGGCAGACGATTTTCATCGGAAGCTTAAATGCCTCGATC  
*B. subt.* 168 415 ACAAAAAATCAAGTCATCCATAAACGCACCGTATTTTATCGGAAGCCTGAATTCATCTATT  
*B. weih.* KBAB4 397 ACGAAAAATCAAGTTATACATAGGCAAACATTTTTTATTGGAAGTTAAATACGTCGATT  
*S. aur.* COL 394 TCAAAAAATGTAGTGATTAAGAAACCTGTGTTTTTAAAGGTACATTAAATAGTTCGATT  
*S. aur.* 71193 394 TCAAAAAATGTAGTGATTAAGAAACCTGTGTTTTTAAAGGTACATTAAATAGTTCGATT  
*E. faec.* DO 403 ACGAAGAATCAAGTGATCTTAAAAAACAAGTGTTCATCGGTCGCTGAATCAGTCAGTC  
consensus 421 .....\*\*.....\*..\*.....\*..\*\*....\*\*....\*..\*\*\*\*\*..\*..\*..

*L. mono.* EGD-e 454 GTTCACCTAGAGAAGTTTTTAGATTGCGCTCAGAAAATCAGCAGCGTCAATTATGTGC  
*L. mono.* F2365 454 GTTCATCCTAGAGAAGTTTTTAGATTAGCGCTCAGAAAATCAGCAGCATCAATCATGTGC  
*L. mar.* FSL S4-120 454 GTTCATCCAAGAGAAGTTTTAGATTAGCGCTAAGAAAATCAGCTGCATCTATTATGTGT  
*L. inn.* Clip11262 454 GTTCATCCTAGAGAAGTTTTTAGACTGGCATTAGAAAATCAGCTGCTTCTATAATGTGT  
*L. wel.* SLCC5334 454 GTTCATCCGAGAGAGTATTTTAGATTAGCACTTAGAAAAGTCTGCTGCTTCTATCATGTGC  
*L. iv.* FSL F6-596 454 GTTCATCCTAGAGAAGTTTTTAGGTTAGCATTAGAAAAGTCTGCTGCTTCTATCATGTGC  
*L. seel.* SLCC3954 454 GTTCATCCGAGAGAAGTTTTTAGATTAGCTTTAAGAAAATCAGCTGCGTCTCTTATGTGT  
*L. gr.* DSM20601 460 GTTCATCCGCGAGAAGTTTTATGGATTAGCTGTACGGAAAATCTGCCGCCAAATCATGTGT  
*B. smi.* 7\_3\_47FAA 469 GTTCATCCTAGGGAAGTGTTTAAGAAGCGCTTCGCCGCTCCGCTGCCTCCATTATTTGC  
*B. coag.* 36D1 463 GTCCATCCCGCGAAGTGTTCAAAGAAGCGCTCAGGCGTTTCAGCTGCTTCCATTATTTGT  
*B. subt.* 168 475 GTCCACCCCGGAGAGGTGTTTAAAGAAGCGTTTTAAACGATCTGCCGCTTCTTTATCTGT  
*B. weih.* KBAB4 457 GTGCACCCAGGGAAGTTTTTAAAGAAGCGTTCCGTCGGGCAGCAGCCTCTATTATATGT  
*S. aur.* COL 454 GTACATCCACGTGAAATTTTTAGTATTGCGGTGAGAGAAAATGCCAATGCAATCATCGCA  
*S. aur.* 71193 454 GTACATCCACGTGAAATTTTTAGTATTGCGGTGAGAGAAAATGCCAATGCAATCATCGCA  
*E. faec.* DO 463 GCTCATCCTAGAGAAATTTTCCATTTATGCTGTACGTTATTGTGCAGCAAGGATCGTTTTTA  
consensus 481 \*..\*\*..\*\*..\*..\*\*..\*..\*.....\*\*..\*.....\*.....\*..\*..\*..\*..\*..\*..\*..



**Figure S2: Nucleic acid based alignment of *radC* sequences from various *Firmicutes*.**

The alignment was done with MAFFT (Kato H, Toh H (2008), Brief Bioinform 9: 286-298), shading of conserved residues was performed with Boxshade. The insertion site of Tn6188 and other Tn554-like transposons is highlighted in red. The consensus is displayed at the bottom of each alignment block, asterisks indicate identical positions, dots indicate similar positions.

Abbreviations and accession numbers: *L. mono.* EGD-e (*L. monocytogenes* EGD-e, NC\_003210), *L. mono.* F2365 (*L. monocytogenes* F2365, NC\_002973), *L. mar.* FSL S4-120 (*L. marthii* FSL S4-120, ADXF01000663), *L. inn.* Clip11262 (*L. innocua* Clip11262, NC\_003212), *L. wel.* SLCC5334 (*L. welshimeri* SLCC5334, NC\_00855), *L. iv.* FSL F6-596 (*L. ivanovii* FSL F6-596, ADXI01000816), *L. seel.* SLCC3954 (*L. seeligeri* SLCC3954, NC\_013891), *L. gr.* DSM20601 (*L. grayi* DSM 20601, ACCR02000005), *B. smi.* 7\_3\_47FAA (*Bacillus smithii* 7\_3\_47FAA, EHL73379), *B. coag.* 36D1 (*Bacillus coagulans* 36D1, NC\_016023), *B. subt.* 168 (*Bacillus subtilis* 168, NC\_000964), *B. weih.* KBAB4 (*Bacillus weihenstephanensis* KBAB4, NC\_010184), *S. aur.* COL\_S. (*Staphylococcus aureus* COL, NC\_002951), *S. aur.* 71193 (*Staphylococcus aureus* 71193, AFH69892), *E. faec.* DO (*Enterococcus faecium* DO, AFK59806).
